# Supplementary material for: Genome-wide targets identification of “core” pluripotency transcription factors with integrated features in human embryonic stem cells
Source: Royal Society of Chemistry journal article supplement (doi:10.1039/c6mb00006a), 2016-02-25
Supplement: c6mb00006a2.xlsx [file c6mb00006a2.xlsx]

## Sheet: Sheet1
TF	Amount of feature	Feature name
OCT4	108	H2AK5ac	H2BK120ac	H2BK12ac	H3K23ac	H3K27me3	H3K4me2	H3K4me3	V$AHRARNT_01	V$AHRARNT_02	V$AP1_Q2	V$AP1_Q4	V$AP1_Q6	V$AP2REP_01	V$ARNT_01	V$ATF_01	V$ATF6_01	V$BACH1_01	V$BRN2_01	V$CART1_01	V$CDC5_01	V$CDP_02	V$CDPCR1_01	V$CEBPA_01	V$CEBPB_01	V$CEBPB_02	V$CHOP_01	V$CMYB_01	V$COMP1_01	V$CREB_01	V$CREB_02	V$CREB_Q4	V$CREBP1_Q2	V$E2F_01	V$E2F_02	V$E2F_03	V$EGR1_01	V$EGR2_01	V$EGR3_01	V$EN1_01	V$EVI1_06	V$FAC1_01	V$FOXD3_01	V$FOXJ2_01	V$FOXO1_02	V$FOXO4_01	V$FREAC3_01	V$FREAC7_01	V$GATA1_02
SOX2	81	H2AK5ac	H2BK120ac	H2BK12ac	H2BK5ac	H3K14ac	H3K18ac	H3K23ac	H3K27ac	H3K36me3	H3K4ac	H3K4me2	H3K4me3	H3K56ac	H3K79me2	H3K9ac	H4K5ac	H4K8ac	H4K91ac	V$AHRARNT_01	V$AHRARNT_02	V$AP1_C	V$ARP1_01	V$ATF_01	V$BRN2_01	V$CDPCR3HD_01	V$CEBPA_01	V$CEBPB_01	V$CREB_01	V$CREB_Q2	V$CREB_Q4	V$E2F_01	V$E2F_02	V$E2F_03	V$EGR1_01	V$EGR2_01	V$EGR3_01	V$EN1_01	V$EVI1_06	V$FAC1_01	V$FOXD3_01	V$FOXJ2_01	V$FOXO1_02	V$FOXO4_01	V$FOXO4_02	V$FREAC2_01	V$FREAC3_01	V$GATA1_03	V$GATA1_04
NANOG	36	H2AK5ac	H2BK120ac	H2BK12ac	H2BK20ac	H2BK5ac	H3K14ac	H3K23ac	H3K27ac	H3K4ac	H3K4me2	H3K4me3	H3K56ac	H3K79me2	H3K9ac	H3K9me3	H4K5ac	H4K91ac	V$AHRARNT_02	V$AP1_Q6	V$FREAC3_01	V$FREAC7_01	V$GATA6_01	V$MAZR_01	V$MSX1_01	V$NFKB_Q6	V$NFY_01	V$NFY_C	V$NFY_Q6	V$OCT_C	V$PAX5_02	V$PBX1_02	V$RFX1_02	V$CEBPB_01	V$E2F_01	V$E2F_02	V$E2F_03
[truncated: 60 more columns]
